1 **Prevalence of chlamydia, gonorrhoea, and trichomoniasis among male and female**  
2 **general populations in sub-Saharan Africa from 2000-2024: A systematic review and**  
3 **meta-regression analysis**

4  
5 Julia Michalow<sup>1\*</sup>, Lauren Hall<sup>1</sup>, Jane Rowley PhD<sup>2</sup>, Rebecca L. Anderson<sup>1</sup>, Quinton Hayre<sup>3</sup>, R.  
6 Matthew Chico PhD<sup>4</sup>, Olanrewaju Edun<sup>1</sup>, Jesse Knight PhD<sup>1</sup>, Salome Kuchukhidze PhD<sup>3</sup>, Evidence  
7 Majaya<sup>5</sup>, Domonique M. Reed PhD<sup>3</sup>, Oliver Stevens<sup>1</sup>, Magdalene K Walters<sup>1</sup>, Remco PH Peters  
8 PhD<sup>2</sup>, Anne Cori PhD<sup>1</sup>, Prof Marie-Claude Boily PhD<sup>1</sup>, Jeffrey W. Imai-Eaton PhD<sup>1,3</sup>

9 <sup>1</sup> MRC Centre for Global Infectious Disease Analysis, School of Public Health, Imperial College  
10 London, London, United Kingdom

11 <sup>2</sup> Department of Global HIV, Hepatitis and Sexually Transmitted Infections Programmes, World  
12 Health Organization, Geneva, Switzerland

13 <sup>3</sup> Center for Communicable Disease Dynamics, Department of Epidemiology, Harvard T.H.  
14 Chan School of Public Health, Boston, Massachusetts, USA

15 <sup>4</sup> Department of Disease Control, Faculty of Infectious and Tropical Diseases, London School of  
16 Hygiene & Tropical Medicine, London, United Kingdom

17 <sup>5</sup> Centre for Infectious Disease Epidemiology and Research, School of Public Health and Family  
18 Medicine, University of Cape Town, Cape Town, South Africa

19  
20 \* Corresponding author: Julia Michalow (j.michalow21@imperial.ac.uk)

21 **Abstract**

22 **Background:** Sub-Saharan Africa (SSA) has the highest sexually transmitted infection (STI)  
23 prevalence globally, but information about trends and geographic variation is limited by sparse  
24 aetiologic studies, particularly among men. This systematic review assessed chlamydia,  
25 gonorrhoea, and trichomoniasis prevalence by sex, sub-region, and year, and estimated male-to-  
26 female prevalence ratios for SSA.

27 **Methods:** We searched Embase, MEDLINE, Global Health, PubMed, and African Index Medicus  
28 for studies measuring STI prevalence among general populations from January 1, 2000, to  
29 September 17, 2024. We adjusted observations for diagnostic test performance and used log-  
30 binomial mixed-effects meta-regressions to estimate prevalence trends and sex-prevalence  
31 ratios.

32 **Findings:** Of 5202 records identified, we included 211 studies from 28 countries. In 2020,  
33 estimated prevalence among 15-49-year-olds in SSA for chlamydia was 6.6% (95%CI: 5.0-8.2%,  
34 n=169 observations) among females and 4.7% (3.4-6.1%, n=33) among males, gonorrhoea was  
35 2.4% (1.4-3.3%, n=171) and 1.7% (0.7-2.6%, n=31), and trichomoniasis was 6.8% (3.6-9.9%,  
36 n=188) and 1.7% (0.7-2.7%, n=19). Male-to-female ratio estimates were 0.61 (0.53-0.71) for  
37 chlamydia, 0.81 (0.61-1.09) for gonorrhoea, and 0.23 (0.18-0.28) for trichomoniasis. From 2010-  
38 2020, chlamydia prevalence increased by 34.5% (11.1-62.9%) in SSA, while gonorrhoea and  
39 trichomoniasis trends were not statistically significant. Chlamydia and gonorrhoea prevalence  
40 were highest in Southern and Eastern Africa, whereas trichomoniasis was similar across sub-  
41 regions.

42 **Interpretation:** SSA has a high, geographically varied STI burden, with increasing prevalence of  
43 chlamydia. Region-specific sex-prevalence ratios differed from existing global ratios and should  
44 be considered in future burden estimates. Enhanced sex-stratified surveillance is crucial to guide  
45 national programmes and reduce STI prevalence in SSA.

46 **Funding:** Gates Foundation, Imperial College London, NIH, UKRI

## 47 **Background**

48 The World Health Organization (WHO) has established targets to reduce the incidence of sexually  
49 transmitted infections (STIs) by 2030.<sup>1</sup> Achieving these targets requires ambitious scale-up of  
50 national STI prevention and control programmes, particularly in sub-Saharan Africa (SSA) where  
51 STI prevalence is highest globally.<sup>1</sup> However, monitoring and optimising these programmes is  
52 challenging due to high rates of asymptomatic infection, variable health-seeking behaviour,  
53 limited diagnostic capacity necessitating syndromic management, and weak surveillance  
54 systems.<sup>2</sup> STI prevalence estimates are crucial for evaluating progress toward WHO targets but  
55 are hindered by infrequent population-representative studies, especially among men.<sup>3</sup>

56 Estimates of curable STI prevalence in SSA are limited. WHO publishes global and regional  
57 prevalence and incidence estimates for curable STIs, including chlamydia (*Chlamydia*  
58 *trachomatis*, CT), gonorrhoea (*Neisseria gonorrhoeae*, NG), and trichomoniasis (*Trichomonas*  
59 *vaginalis*, TV), approximately every four years.<sup>4-9</sup> These focus on global geographic regions and do  
60 not report sub-regional variation or temporal trends. The Global Burden of Disease (GBD) study  
61 generates global, regional, and national prevalence and incidence trends for several STIs.<sup>10</sup> Both  
62 estimation approaches depend heavily on available data and underlying model assumptions.  
63 Due to limited data among men, WHO and GBD have derived male-to-female prevalence ratios  
64 from global data and applied these in most regions to support male prevalence estimates.<sup>5,8,10</sup>  
65 Although WHO reviews its global ratios prior to each estimation round, values have not been  
66 updated since 1999 for trichomoniasis and 2005 for chlamydia and gonorrhoea.<sup>5,8</sup> Additionally,  
67 several systematic reviews have assessed the prevalence of curable STIs in SSA sub-regions  
68 among pregnant women,<sup>11,12</sup> women participating in HIV prevention trials,<sup>13</sup> or women living with  
69 HIV,<sup>14</sup> but their generalisability beyond the specified populations is limited and these reviews  
70 have not examined changes in STI prevalence over time.

71 We therefore conducted a systematic review of studies on chlamydia, gonorrhoea, and  
72 trichomoniasis prevalence among adults considered representative of the general population  
73 (i.e. not conducted among groups identified as key populations, as defined in WHO guidelines on  
74 HIV, STIs, and viral hepatitis<sup>1</sup>) in SSA from 2000 to 2024. We performed meta-analyses to assess  
75 variations in STI prevalence by sex, sub-region, and over time. To inform future regional and global  
76 STI burden estimation efforts, we derived updated male-to-female prevalence ratios specific to  
77 SSA.

## 78 **Methods**

### 79 *Search strategy*

80 We systematically searched Embase (Ovid), MEDLINE (Ovid), Global Health (Ovid), PubMed, and  
81 African Index Medicus from 1 January 2000 to 17 September 2024 for studies assessing the  
82 prevalence of chlamydia, gonorrhoea, and trichomoniasis in SSA. Search term domains included  
83 relevant terms and synonyms for “sexually transmitted infections” and “sub-Saharan Africa”  
84 (Table S1). We also searched citations from relevant published systematic reviews.<sup>7-9,11-20</sup>

### 85 *Eligibility criteria and study selection*

86 We included studies reporting sex-stratified empirical data on the prevalence of chlamydia,  
87 gonorrhoea, or trichomoniasis among adults from the general population in SSA between 2000  
88 and 2024. We considered studies to represent the general population if they enrolled participants  
89 from antenatal care (ANC), family planning, or gynaecology clinics; primary healthcare or other  
90 outpatient services; educational institutions; or community venues (e.g., social spaces or places  
91 of worship); or recruited participants for HIV or STI prevention trials (baseline data only) or  
92 population-representative surveys. We excluded studies if participants sought treatment for STI  
93 symptoms or infertility or were enrolled exclusively from populations living with HIV or key  
94 populations.

95 We included studies with participants aged 12 years or older who were tested using  
96 internationally recognised aetiological diagnostic tests with urogenital specimens (urine, urethral,  
97 or cervicovaginal samples), and excluded studies that only collected pharyngeal or rectal  
98 samples. We also excluded case reports, commentaries, longitudinal and randomised controlled  
99 studies reporting only post-baseline outcomes, and studies with fewer than 15 participants. We  
100 used the UN M49 standard to define SSA and its sub-regions (Table S2).<sup>21</sup>

101 Search results were managed and de-duplicated using Covidence systematic review software  
102 (Veritas Health Innovation, Melbourne, Australia).<sup>22</sup> Researchers (DMR, EM, JM, JWI-E, JK, LH,  
103 MKW, OE, OS, QH, RLA, SK) independently double-screened title and abstract records for  
104 eligibility and assessed full text articles for inclusion. A third reviewer resolved discrepancies.

#### 105 *Data extraction*

106 Researchers (JM, LH, RLA, QH) independently double-extracted prevalence observations  
107 (number of individuals with a positive result of the total number tested) for each study with  
108 stratification by country, sex, and population group, as available. We also recorded information  
109 on study characteristics, participant characteristics, and diagnostic methodology (Table S3).  
110 Discrepancies were resolved through consensus.

111 If outcomes from the same study were reported in multiple articles, we preferentially extracted  
112 observations from the largest sample or, if samples were the same size, the first published article.  
113 For studies collecting samples from multiple anatomical sites, we extracted only urogenital  
114 results. If multiple diagnostic tests were conducted, we extracted outcomes from the test and  
115 sample type with highest sensitivity and specificity for pathogen identification (Table S4). We  
116 preferentially extracted non-stratified rather than HIV-stratified outcomes, if both were reported.

#### 117 *Data analysis*

118 We adjusted study prevalence estimates to account for imperfect diagnostic test sensitivity and  
119 specificity, using a previously described Bayesian approach.<sup>23</sup> Sensitivity and specificity values  
120 for each test category were collated from published literature, with preference for characteristics  
121 published by the WHO (Table S4).<sup>5,23,24</sup>

122 For studies that did not report data collection dates (n=26), we imputed the midpoint year of data  
123 collection by subtracting the median publication lag from the publication year (three years, based  
124 on the difference between the data collection midpoint year and year of publication among  
125 studies with dates reported). For one study spanning multiple sub-regions without country- or

126 region-specific data reported,<sup>25</sup> we classified the study sub-region according to where most  
127 participants had been recruited.

128 To estimate sub-regional trends in sex-specific STI prevalence in SSA, we fit log-binomial mixed-  
129 effects meta-regressions for each pathogen. Fixed effects included year (midpoint of data  
130 collection), study population (ANC attendees, family planning clinic attendees, gynaecology  
131 clinic attendees, primary healthcare or other outpatient facility attendees, students, community  
132 members recruited from non-clinical venues, HIV/STI prevention trial participants, and  
133 population-representative survey participants), sex (female, male), age group (younger adults 12–  
134 25 years, all adults ≥ 12 years), HIV status (HIV negative, non-stratified HIV status), diagnostic test  
135 (nucleic acid amplification test [NAAT], culture, direct fluorescent antibody, enzyme  
136 immunosorbent assay, rapid antigen test, wet mount), sub-region (Western and Central Africa  
137 [WCA], Eastern Africa [EA], or Southern Africa [SA]), year and sub-region interaction term, and sex  
138 and sub-region interaction term. A year and sex interaction term was not included due to limited  
139 observations of male prevalence. We combined Western and Central Africa due to limited  
140 prevalence observations in Central Africa. Study-level random intercepts allowed for between-  
141 study heterogeneity. Fitted models were used to predict the prevalence of each infection among  
142 male and female adults by sub-region between 2000 and 2024, using reference categories for  
143 covariates in the model (study population: ANC attendees, HIV status: non-stratified, diagnostic  
144 test: NAAT). We report estimates for sub-regions and all of SSA for 2020. SSA estimates were  
145 obtained by weighting sub-regional predictions with sex-matched population size for adults aged  
146 15-49 years in 2020, according to UN World Population Prospects 2024.<sup>26</sup> Standard errors were  
147 determined using the delta method.<sup>27</sup>

148 To assess sex differences in prevalence, we estimated male-to-female prevalence ratios using  
149 observations from all studies (between-study ratios) and for the subset of studies providing  
150 estimates for both sexes (within-study ratios). We estimated between-study ratios using  
151 previously described meta-regression models. We determined within-study ratios using the  
152 same meta-regression approach, but without fixed effects for population group and an  
153 interaction term for sex and sub-region, due to limited observations. We also derived pooled  
154 within-study ratios without adjusting for any covariates.

155 We assessed sensitivity of prevalence estimates, trends, and male-to-female prevalence-ratios  
156 to adjustments for diagnostic performance by comparing results from models using all available  
157 observations versus only NAAT-diagnosed observations, with and without accounting for test  
158 sensitivity and specificity. Unless indicated otherwise, all main results reflect observations  
159 adjusted for diagnostic test performance. Results are presented as means with 95% confidence  
160 intervals (95% CIs). Model coefficients are presented as adjusted prevalence ratios (aPRs), with  
161 confidence intervals calculated on the log scale prior to exponentiation. Analyses were  
162 conducted in R version 4.2.3; Bayesian diagnostic test performance adjustments used rstan  
163 version 2.26.21<sup>28</sup> and meta-regression modelling used glmmTMB version 1.1.8.<sup>29</sup>

164 We pre-registered our study with PROSPERO (CRD: 42023420384)<sup>30</sup> and reported according to  
165 the Preferred Reporting Items for Systematic Reviews and Meta-Analyses (PRISMA) guideline.<sup>31</sup>  
166 The Imperial College Research Ethics Committee approved analysis of secondary data for this  
167 study (ICREC #6365329).

## 168 Results

### 169 Search results and scope

170 We identified 11,136 records through the database search, of which 5,934 were duplicates and  
171 5,202 were screened (Figure 1). Of these, 783 full-text articles were assessed and 301 met  
172 eligibility criteria. After adding 11 articles identified through citation searching and excluding 98  
173 articles with duplicate study observations, we included 214 articles from 211 unique studies,  
174 from which we extracted 614 prevalence observations (NG=203, CT=203, TV=208; Table S5). Most  
175 studies were in Eastern Africa (N=90/211, 42.7%), followed by Western and Central (N=71/211,  
176 33.6%), and Southern (N=59/211, 28.0%) Africa (Table 1). Studies were conducted in 28 different  
177 sub-Saharan African countries, with most in South Africa (N=53/211, 25.1%), Nigeria (N=38/211,  
178 18.0%), Kenya (N=26/211, 12.3%), Tanzania (N=20/211, 9.5%), and Uganda (N=19/211, 9.0%)  
179 (Figure S1). Study populations were predominantly ANC attendees (N=85/211, 40.3%), primary  
180 healthcare or outpatient department attendees (N=30/211, 14.2%), and HIV/STI prevention trial  
181 participants (N=24/211, 11.4%). Few studies were among population-representative survey  
182 samples (N=11/211, 5.2%). Most studies were solely among females (N=174/211, 82.5%). A  
183 limited number included both sexes (N=29/211, 13.7%) or males only (N=8/211, 3.8%). Studies  
184 were predominantly among all adults (N=180/211, 85.3%), rather than restricted to younger  
185 adults (N=31/211, 14.6%). Across all studies, most enrolled within the 15-49-year age range  
186 (N=109/211, 51.7%), while others included younger and/or older participants (N=45/211, 21.3%),  
187 reported only a minimum adult age (N=37/211, 17.5%), or did not report age ranges (N=20/211,  
188 9.5%).

### 189 Sexually transmitted infection prevalence

190 In 2020, estimated prevalence of chlamydia in SSA was 6.6% (95%CI: 5.0-8.2%, number of  
191 observations (n)=169) among females and 4.7% (3.4-6.1%, n=33) among males, gonorrhoea was  
192 2.4% (1.4-3.3%, n=171) and 1.7% (0.7-2.6%, n=31), and trichomoniasis was 6.8% (3.6-9.9%,  
193 n=188) and 1.7% (0.7-2.7%, n=19), respectively (Figure 2A). From 2010 to 2020, chlamydia  
194 prevalence increased by 34.5% (11.1-62.9%) in SSA, while trends for gonorrhoea (3.3% increase  
195 [-20.2-33.9%]) and trichomoniasis (17.8% increase [-3.8-34.9%]) were not statistically significant  
196 (Table 2, Figure 2B).

197 Sub-regional variations in prevalence were similar for chlamydia and gonorrhoea (Table 2, Figure  
198 2A). Among females, relative to Southern Africa, the prevalence of chlamydia and gonorrhoea  
199 were lowest in Western and Central Africa (aPR<sub>CT</sub>: 0.31 [0.22-0.43], aPR<sub>NG</sub>: 0.36 [0.23-0.57]),  
200 followed by Eastern Africa (aPR<sub>CT</sub>: 0.38 [0.35-0.41], aPR<sub>NG</sub>: 0.64 [0.56-0.74]). Similarly for males,  
201 prevalence was lower in Western and Central (aPR<sub>CT</sub>: 0.38 [0.32-0.46], aPR<sub>NG</sub>: 0.58 [0.44-0.78])  
202 and Eastern Africa (aPR<sub>CT</sub>: 0.32 [0.19-0.53], aPR<sub>NG</sub>: 0.50 [0.23-1.10]) compared to Southern Africa.  
203 For trichomoniasis, female prevalence was similar across sub-regions (WCA aPR<sub>TV</sub>: 0.94 [0.68-  
204 1.31], EA aPR<sub>TV</sub>: 1.01 [0.85-1.21]), while male prevalence was higher in Eastern (aPR<sub>TV</sub>: 2.45 [1.66-  
205 3.61]) than Southern Africa.

206 Time trends for each infection varied across sub-regions. Chlamydia prevalence increased in  
207 Eastern (aPR<sub>CT</sub> per year: 1.07 [1.05-1.09]) and Southern Africa (aPR<sub>CT</sub>: 1.02 [1.00-1.04]), while  
208 trichomoniasis prevalence decreased in Southern Africa (aPR<sub>TV</sub>: 0.96 [0.92-0.99]) only.  
209 Gonorrhoea prevalence was stable across all three sub-regions (Table 2, Figure 2B).

210 Across study populations, there was no evidence that the prevalence of any infection differed  
211 compared to ANC attendees, except for lower trichomoniasis prevalence among family planning  
212 clinic attendees (aPR: 0.54 [0.32-0.90]). Studies diagnosing chlamydia with a rapid antigen test  
213 (aPR<sub>CT</sub>: 2.94 [1.76-4.92]), gonorrhoea with culture (aPR<sub>NG</sub>: 1.60 [1.00-2.54]), and trichomoniasis  
214 with wet mount (aPR<sub>TV</sub>: 1.61 [1.14-2.29]) had higher prevalence than those that used NAAT, after  
215 accounting for diagnostic test performance (Table 2).

#### 216 *Male-to-female prevalence ratio estimates*

217 In SSA, male-to-female prevalence ratio estimates for each infection were similar when  
218 estimated using adjusted between-study ratios (all available data), adjusted within-study ratios  
219 (paired data), or unadjusted pooled within-study ratios (Figure 3, Table 2, Table S6). Male-to-  
220 female prevalence ratio estimates (adjusted between-study) for SSA in 2020 were 0.61 (0.53-  
221 0.71) for chlamydia, 0.81 (0.61-1.09) for gonorrhoea, and 0.23 (0.18-0.28) for trichomoniasis  
222 (Figure 3, Table 2). Between-study prevalence ratios were consistent across sub-regions for  
223 chlamydia (WCA:0.63 [0.43-0.93], EA:0.61 [0.53-0.70], SA:0.61 [0.55-0.66]), but varied for  
224 gonorrhoea (WCA:1.05 [0.54-2.04], EA:0.69 [0.56-0.85], SA:0.76 [0.65-0.90]) and trichomoniasis  
225 (WCA:0.14 [0.09-0.20], EA:0.36 [0.30-0.44], SA:0.15 [0.11-0.20]; Table 2).

#### 226 *Sensitivity analyses of diagnostic test performance*

227 Prevalence estimates in 2020 were consistent for all three infections when derived using all  
228 available or NAAT-only observations, with or without accounting for diagnostic test performance  
229 (Table 2, Table S7-S9, Figure S2). Temporal trends for chlamydia and gonorrhoea also remained  
230 consistent across sub-regions. However, for trichomoniasis, all-observation models showed a  
231 prevalence decline in Southern Africa (aPR: 0.96 [0.92-0.99] with and without test performance),  
232 while NAAT-only models did not (with test performance: 0.96 [0.90-1.02]; without: 0.96 [0.92-  
233 1.01]; Table 2, Table S7-S9, Figure S3). Between-study and within-study male-to-female  
234 prevalence ratios were consistent for all three infections, whether derived using all available or  
235 NAAT-only observations. However, accounting for test performance led to higher ratios for  
236 gonorrhoea and lower ratios for chlamydia and trichomoniasis (Table 2, Table S7-S9, Figure S4).

## 237 **Discussion**

238 Our analysis estimated the prevalence of chlamydia, gonorrhoea and trichomoniasis among  
239 general populations in SSA between 2000 and 2024. We estimated a higher burden of curable  
240 STIs among females (6.9% chlamydia, 1.8% gonorrhoea, and 7.6% trichomoniasis in 2020) than  
241 males (4.2%, 1.5%, and 1.7% respectively), which exceeded global prevalence estimates (3.2%,  
242 0.7%, and 2.7% for both sexes in 2020, respectively).<sup>9</sup> Geographic variation was substantial;  
243 prevalence of chlamydia and gonorrhoea was highest in Southern Africa, followed by Eastern  
244 Africa and then Western and Central Africa. Trichomoniasis prevalence was similar across sub-  
245 regions for females but was highest in Eastern Africa for males. The prevalence of chlamydia  
246 increased considerably in Eastern and Southern Africa over the study period, while gonorrhoea  
247 was stable, and trichomoniasis decreased in Southern Africa.

248 Our central estimates of STI prevalence in 2020 differed from those reported by WHO for the  
249 African region and GBD for SSA.<sup>9,10</sup> For females, our estimates were higher for chlamydia (6.9%  
250 vs. WHO:5.5%, GBD:4.5%), similar for gonorrhoea (1.8% vs. WHO:1.6%, GBD:1.7%), and lower

251 for trichomoniasis (7.6% vs. WHO:12.0%, GBD:12.6%). For males, our estimates were higher for  
252 chlamydia (4.2% vs. WHO:4.0%, GBD:2.5%), gonorrhoea (1.5% vs. WHO:1.2%, GBD:1.2%), and  
253 trichomoniasis (1.7% vs. WHO:1.3%, GBD:1.5%).<sup>9,10</sup> These differences reflect our broader study  
254 inclusion criteria, incorporation of more recent studies, and analysis of temporal trends to reflect  
255 sub-regional changes in prevalence. Compared to existing global male-to-female prevalence  
256 ratios, our SSA ratio estimates were lower for chlamydia (WHO: 0.80 and GBD: 0.91), and  
257 intermediate for gonorrhoea (WHO: 0.86 and GBD: 0.71) and trichomoniasis (WHO: 0.10 and  
258 GBD: 0.25; Figure 3).<sup>5,8,10</sup> Although our analysis indicated sub-regional ratio variation, data  
259 limitations precluded more detailed exploration. Given these differences, future estimation  
260 exercises should prioritise using region-specific ratios to capture local epidemiologic  
261 differences, although sparse male prevalence data can hinder ratio estimation.

262 The spatial distribution of chlamydia and gonorrhoea prevalence mirror that of HIV prevalence in  
263 SSA, characterised by highest burden in Southern Africa, followed by Eastern Africa, and lowest  
264 in Western and Central Africa.<sup>32</sup> This is likely due to shared behavioural risk factors and biological  
265 synergies that facilitate co-infection.<sup>33</sup> Despite evidence suggesting that trichomoniasis  
266 increases HIV transmission and acquisition risk,<sup>34</sup> prevalence variations were not observed  
267 across sub-regions. This could reflect limitations in study availability and diagnostics, missing  
268 covariates, or incomplete adjustment for covariates such as age.<sup>35</sup> Greater integration of STI and  
269 HIV services remains important for their effective mitigation in high-burden areas.<sup>1</sup>

270 The increasing prevalence of chlamydia in Eastern and Southern Africa and decreasing  
271 prevalence of trichomoniasis in Southern Africa have not been documented previously. Previous  
272 STI burden assessments reported stable prevalence over time for chlamydia and gonorrhoea in  
273 Kenya and South Africa<sup>36,37</sup> or did not estimate time trends for curable STIs in SSA.<sup>8,11-14</sup> For  
274 chlamydia, increases in prevalence are particularly concerning given the severe, long-term health  
275 consequences of untreated infection, including chronic pelvic pain, infertility, ectopic pregnancy,  
276 and other adverse pregnancy outcomes, along with an increased risk of HIV transmission.<sup>1</sup> For  
277 trichomoniasis, declines in prevalence warrant cautious interpretation. Our trend estimates were  
278 sensitive to the diagnostic tests included, due to more widespread use of NAAT rather than wet  
279 mount microscopy in recent studies.

280 Our analysis was primarily limited by sparse and heterogenous data. Our systematic search  
281 identified only 211 studies in 28 of 48 SSA countries. There were particularly few studies in Central  
282 Africa (12 studies in 6 countries) and among men (37 studies in 15 countries). We were therefore  
283 unable to generate estimates specific to Central Africa or to determine whether temporal  
284 prevalence trends differed by sex. Our estimates for Southern Africa relied predominantly on  
285 studies conducted in South Africa (51 of 59 studies in the sub-region), which limited our ability to  
286 assess the representativeness of both these studies and our estimates for the broader sub-  
287 region.

288 Limitations related to study representativeness and reporting, and adjustments made in our  
289 analysis, may have influenced our estimates. Given the lack of population-representative  
290 studies, we used ANC attendees as the reference category for our prevalence estimates. At least  
291 65% of studies focused exclusively on sexually active individuals, including antenatal, family  
292 planning, and gynaecology clinic attendees, and HIV/STI prevention trial participants. We



293 considered these groups to be representative of the general population, which may result in  
294 overestimating STI prevalence compared to the total adult population. Variability in reporting  
295 across studies hindered our adjustment of estimates for HIV prevalence, granular age groups, or  
296 urban/rural location, which likely influenced sub-regional heterogeneities. Furthermore, our  
297 adjustments for diagnostic test performance may have overestimated prevalence, particularly for  
298 trichomoniasis, due to the poor sensitivity of widely used wet mount microscopy. Our reliance on  
299 previously published WHO performance data, without accounting for improvements in  
300 diagnostic accuracy over time, may have resulted in over-adjusting recent study observations and  
301 thus overestimating temporal trends.

302 Despite these limitations, our systematic review provides a comprehensive analysis of  
303 chlamydia, gonorrhoea, and trichomoniasis prevalence in SSA. We have addressed gaps in  
304 previous prevalence estimates by examining temporal trends and sub-regional variation, while  
305 incorporating studies from a range of populations considered representative of the general  
306 population. Our multiple analytical approaches yielded similar male-to-female prevalence ratio  
307 estimates, and our extensive sensitivity analyses of diagnostic test performance adjustments  
308 have strengthened the robustness of our findings.

309 In conclusion, we estimated a high and geographically varied prevalence of three curable STIs in  
310 SSA, with concerning increases in chlamydia prevalence over time. Male-to-female prevalence  
311 ratios for SSA and its sub-regions differed from existing WHO and GBD global ratios, emphasising  
312 the need to account for epidemiologic variations in future STI burden estimates and control  
313 strategies. Strengthening sex-stratified aetiologic surveillance, through both regular sentinel  
314 surveys and population-representative prevalence studies, is essential for progressing toward  
315 WHO targets and reducing the STI burden in SSA.

## 316 **Contributors**

317 JM, JR, JWI-E, and M-CB conceptualised the study. DMR, EM, JM, JWI-E, JK, LH, MKW, OE, OS, QH,  
318 RLA, and SK screened abstracts and full text articles for inclusion. JM, LH, RLA, and QH extracted  
319 data from included studies. JM assessed diagnostic test validity, collated diagnostic test  
320 performance characteristics, and performed the data analysis. JM wrote the initial manuscript  
321 draft, which was revised with input from all authors. All authors approved the final manuscript.

## 322 **Declaration of interests**

323 The authors have no competing interests to declare.

## 324 **Funding**

325 JM acknowledges funding from the Imperial College President's PhD Fund. EM and JWI-E  
326 acknowledge funding from the Gates Foundation (INV-005576). AC, JK, JM, JWI-E, M-CB, MKW,  
327 OE, OS, and RLA acknowledge funding from the MRC Centre for Global Infectious Disease  
328 Analysis (reference MR/R015600/1), jointly funded by the UK Medical Research Council (MRC)  
329 and the UK Foreign, Commonwealth & Development Office (FCDO), under the MRC/FCDO  
330 Concordat agreement and is also part of the EDCTP2 programme supported by the European  
331 Union. SK was supported by the National Institute of Child Health and Human Development of  
332 the National Institutes of Health under award number R01HD101351. MKW was supported by the

333 National Institute of Allergy and Infectious Diseases of the National Institutes of Health under  
334 award number R01AI152721.

335 Under the grant conditions of UKRI and the Gates Foundation, a Creative Commons Attribution  
336 4.0 Generic License (CC BY) has already been assigned to any Author Accepted Manuscript  
337 version arising from this submission. The content is solely the responsibility of the authors and  
338 does not necessarily represent the official views of the funders.

339 **Data sharing**

340 Data extracted from included studies and used for analysis are available as supplementary  
341 material. Code and data reproducing the analysis is available from  
342 <https://github.com/juliamichalow/sti-prevalence-ratios>.

343

## 344 References

- 345 1 World Health Organization. Global health sector strategies on, respectively, HIV, viral  
346 hepatitis and sexually transmitted infections for the period 2022-2030. Geneva, 2022.
- 347 2 World Health Organization. Framework for monitoring sexually transmitted infections  
348 and strengthening surveillance. Geneva, 2024.
- 349 3 World Health Organization. Report on global sexually transmitted infection surveillance.  
350 Geneva, 2018.
- 351 4 World Health Organization. Global prevalence and incidence of selected curable sexually  
352 transmitted infections. Overview and estimates. Geneva, 2001.
- 353 5 World Health Organization. Prevalence and incidence of selected sexually transmitted  
354 infections: Methods and results used by WHO to generate 2005 estimates. Geneva,  
355 2011.
- 356 6 World Health Organization. Global incidence and prevalence of selected curable sexually  
357 transmitted infections - 2008. Geneva, 2012 DOI:10.1016/s0968-8080(12)40660-7.
- 358 7 Newman L, Rowley J, Hoorn S Vander, *et al.* Global estimates of the prevalence and  
359 incidence of four curable sexually transmitted infections in 2012 based on systematic  
360 review and global reporting. *PLoS One* 2015; **10**: 1–17.
- 361 8 Rowley J, Hoorn S Vander, Korenromp E, *et al.* Chlamydia, gonorrhoea, trichomoniasis  
362 and syphilis: Global prevalence and incidence estimates, 2016. *Bull World Health Organ*  
363 2019; **97**: 548–62.
- 364 9 World Health Organization. Global progress report on HIV, viral hepatitis and sexually  
365 transmitted infections. Web Annex 2: Data methods. Geneva, 2021.
- 366 10 Ferrari AJ, Santomauro DF, Aali A, *et al.* Global incidence, prevalence, years lived with  
367 disability (YLDs), disability-adjusted life-years (DALYs), and healthy life expectancy  
368 (HALE) for 371 diseases and injuries in 204 countries and territories and 811 subnational  
369 locations, 1990–2021: a systematic analysis for the Global Burden of Disease Study  
370 2021. *The Lancet* 2024; **403**: 2133–61.
- 371 11 Nyemba DC, Haddison EC, Wang C, Johnson LF, Myer L, Davey DJ. Prevalence of curable  
372 STIs and bacterial vaginosis during pregnancy in sub-Saharan Africa: a systematic review  
373 and meta-analysis. *Sex Transm Infect* 2022; **98**: 484–91.
- 374 12 Chico RM, Mayaud P, Ariti C, Mabey D, Ronsmans C, Chandramohan D. Prevalence of  
375 malaria and sexually transmitted and reproductive tract infections in pregnancy in sub-  
376 Saharan Africa: a systematic review. *JAMA* 2012; **307**: 2079–86.
- 377 13 Torrone EA, Morrison CS, Chen PL, *et al.* Prevalence of sexually transmitted infections  
378 and bacterial vaginosis among women in sub-Saharan Africa: an individual participant  
379 data meta-analysis of 18 HIV prevention studies. *PLoS Med* 2018; **15**: e1002511.

- 380 14 Jarolimova J, Platt LR, Curtis MR, *et al.* Curable sexually transmitted infections among  
381 women with HIV in sub-Saharan Africa. *Aids* 2022; **36**: 697–709.
- 382 15 Kassa ZY, Hussen S, Hadra N, Moges Y, Bonja F. Prevalence of *Neisseria gonorrhoeae*  
383 infection among women of reproductive age in sub-Saharan Africa: a systematic review  
384 and meta-analysis. *The European Journal of Contraception & Reproductive Health Care*  
385 2020; **25**: 365–71.
- 386 16 Hussen S, Wachamo D, Yohannes Z, Tadesse E. Prevalence of chlamydia trachomatis  
387 infection among reproductive age women in sub Saharan Africa: a systematic review and  
388 meta-analysis. *BMC Infect Dis* 2018; **18**. <https://pubmed.ncbi.nlm.nih.gov/30477441/>  
389 (accessed Sept 4, 2024).
- 390 17 Vaezzadeh K, Sepidarkish M, Mollalo A, *et al.* Global prevalence of *Neisseria*  
391 *gonorrhoeae* infection in pregnant women: a systematic review and meta-analysis. *Clin*  
392 *Microbiol Infect* 2023; **29**: 22–31.
- 393 18 Joseph Davey DL, Shull HI, Billings JD, Wang D, Adachi K, Klausner JD. Prevalence of  
394 Curable Sexually Transmitted Infections in Pregnant Women in Low- and Middle-Income  
395 Countries From 2010 to 2015: A Systematic Review. *Sex Transm Dis* 2016; **43**: 450–8.
- 396 19 Whelan J, Abbing-Karahagopian V, Serino L, Unemo M. Gonorrhoea: a systematic review  
397 of prevalence reporting globally. *BMC Infectious Diseases* 2021 21:1 2021; **21**: 1–23.
- 398 20 Williams R, Auzenberg M, Etombi CL, *et al.* P187. Curable STIs among pregnant women  
399 attending antenatal care facilities in low- and middle-income countries from 2000 to  
400 2022: A systematic review and meta-analysis. In: 23rd IUSTI World Congress. 2022.
- 401 21 UN Statistics Division. Standard country or area codes for statistical use (M49).  
402 <https://unstats.un.org/unsd/methodology/m49/> (accessed June 14, 2023).
- 403 22 Covidence systematic review software. Veritas Health Innovation, Melbourne, Australia.  
404 <https://www.covidence.org/> (accessed Dec 2, 2024).
- 405 23 Michalow J, Walters MK, Olanrewaju E, *et al.* Aetiology of vaginal discharge, urethral  
406 discharge, and genital ulcer in sub-Saharan Africa: A systematic review and meta-  
407 regression. *PLoS Med* 2024; **21**: e1004385.
- 408 24 World Health Organization. Laboratory and point-of-care diagnostic testing for sexually  
409 transmitted infections, including HIV. Geneva, 2023.
- 410 25 Delany-Moretlwe S, Hughes JP, Bock P, *et al.* Cabotegravir for the prevention of HIV-1 in  
411 women: results from HPTN 084, a phase 3, randomised clinical trial. *The Lancet* 2022;  
412 **399**: 1779–89.
- 413 26 UN Population Division. Data Portal. <https://population.un.org/dataportal/home>  
414 (accessed Aug 21, 2023).
- 415 27 Hogg R V, McJean JW, Craig AT. Introduction to mathematical statistics, Eighth ed.  
416 Boston: Pearson, 2019.

- 417 28 Stan Development Team. RStan: the R interface to Stan. R package version 2.21.2. 2020.  
418 <https://mc-stan.org/> (accessed May 29, 2023).
- 419 29 Generalized linear mixed models using Template Model Builder. R package version 1.1.7.  
420 2023; published online April 5.
- 421 30 Hall L, Michalow J, Imai-Eaton JW, Boily M-C, Rowley J, Chico M. Sexually transmitted  
422 infection prevalence ratios in sub-Saharan Africa: a systematic review and meta-  
423 analysis. *PROSPERO* 2024.
- 424 31 Page MJ, McKenzie JE, Bossuyt PM, *et al.* The PRISMA 2020 statement: an updated  
425 guideline for reporting systematic reviews. *BMJ* 2021; **372**.
- 426 32 Joint United Nations Programme on HIV/AIDS. IN DANGER: UNAIDS Global AIDS Update.  
427 Geneva, 2022.
- 428 33 Cohen MS, Council OD, Chen JS. Sexually transmitted infections and HIV in the era of  
429 antiretroviral treatment and prevention: the biologic basis for epidemiologic synergy. *J Int*  
430 *AIDS Soc* 2019; **22**. DOI:10.1002/jia2.25355.
- 431 34 Kissinger P, Adamski A. Trichomoniasis and HIV interactions: A review. *Sex Transm Infect*  
432 2013; **89**: 426–33.
- 433 35 Workowski KA, Bachmann LH, Chan PA, *et al.* Sexually Transmitted Infections Treatment  
434 Guidelines, 2021. *MMWR Recommendations and Reports* 2021; **70**: 1.
- 435 36 Kularatne RS, Niit R, Rowley J, *et al.* Adult gonorrhoea, chlamydia and syphilis prevalence,  
436 incidence, treatment and syndromic case reporting in South Africa: Estimates using the  
437 Spectrum-STI model, 1990-2017. *PLoS One* 2018; **13**: 205863.
- 438 37 Korenromp EL, Mahiané G, Rowley J, *et al.* Estimating prevalence trends in adult  
439 gonorrhoea and syphilis in low- and middle-income countries with the Spectrum-STI  
440 model: Results for Zimbabwe and Morocco from 1995 to 2016. *Sex Transm Infect* 2017;  
441 **93**: 599–606.
- 442
- 443

444 **Table 1: Summary of characteristics for included studies.**

| Variable                                         | Group                                                 | Chlamydia<br>(N=139) | Gonorrhoea<br>(N=140) | Trichomoniasis<br>(N=162) | Total<br>(N=211) |
|--------------------------------------------------|-------------------------------------------------------|----------------------|-----------------------|---------------------------|------------------|
| <b>Sub-region<sup>1</sup></b>                    | Western Africa                                        | 20 (14.4%)           | 20 (14.3%)            | 51 (31.5%)                | 59 (28.0%)       |
|                                                  | Central Africa <sup>2</sup>                           | 10 (7.2%)            | 8 (5.7%)              | 8 (4.9%)                  | 12 (5.7%)        |
|                                                  | Eastern Africa                                        | 69 (49.6%)           | 70 (50.0%)            | 63 (38.9%)                | 90 (42.7%)       |
|                                                  | Southern Africa                                       | 49 (35.3%)           | 51 (36.4%)            | 46 (28.4%)                | 59 (28.0%)       |
|                                                  | Multiple sub-regions <sup>3</sup>                     | 1 (0.7%)             | 1 (0.7%)              | 1 (0.6%)                  | 1 (0.5%)         |
| <b>Study<br/>midpoint<br/>year<sup>1,4</sup></b> | 2000-2004                                             | 27 (19.4%)           | 32 (22.9%)            | 34 (21.0%)                | 45 (21.3%)       |
|                                                  | 2005-2009                                             | 18 (12.9%)           | 19 (13.6%)            | 21 (13.0%)                | 27 (12.8%)       |
|                                                  | 2010-2014                                             | 35 (25.2%)           | 31 (22.1%)            | 38 (23.5%)                | 51 (24.2%)       |
|                                                  | 2015-2019                                             | 42 (30.2%)           | 41 (29.3%)            | 54 (33.3%)                | 64 (30.3%)       |
|                                                  | 2020-2024                                             | 18 (12.9%)           | 17 (12.1%)            | 15 (9.3%)                 | 25 (11.8%)       |
| <b>Population<br/>group<sup>1</sup></b>          | ANC attendees                                         | 39 (28.1%)           | 42 (30.0%)            | 75 (46.3%)                | 85 (40.3%)       |
|                                                  | FP attendees                                          | 12 (8.6%)            | 12 (8.6%)             | 11 (6.8%)                 | 17 (8.1%)        |
|                                                  | GYN attendees                                         | 6 (4.3%)             | 8 (5.7%)              | 11 (6.8%)                 | 14 (6.6%)        |
|                                                  | PHC/OPD attendees                                     | 22 (15.8%)           | 22 (15.7%)            | 20 (12.3%)                | 30 (14.2%)       |
|                                                  | Students                                              | 15 (10.8%)           | 11 (7.9%)             | 15 (9.3%)                 | 19 (9.0%)        |
|                                                  | Community members <sup>5</sup>                        | 15 (10.8%)           | 16 (11.4%)            | 6 (3.7%)                  | 17 (8.1%)        |
|                                                  | HIV/STI prevention trial<br>participants <sup>6</sup> | 22 (15.8%)           | 22 (15.7%)            | 22 (13.6%)                | 24 (11.4%)       |
|                                                  | Population-representative<br>survey participants      | 10 (7.2%)            | 10 (7.1%)             | 8 (4.9%)                  | 11 (5.2%)        |
| <b>Sex</b>                                       | Female only                                           | 106 (76.3%)          | 109 (77.9%)           | 143 (88.3%)               | 174 (82.5%)      |
|                                                  | Male only                                             | 7 (5.0%)             | 5 (3.6%)              | 7 (4.3%)                  | 8 (3.8%)         |
|                                                  | Both sexes (stratified)                               | 26 (18.7%)           | 26 (18.6%)            | 12 (7.4%)                 | 29 (13.7%)       |
| <b>Age group</b>                                 | Adult (12+ years)                                     | 112 (80.6%)          | 116 (82.9%)           | 140 (86.4%)               | 180 (85.3%)      |
|                                                  | Youth (12–25 years)                                   | 27 (19.4%)           | 25 (17.9%)            | 22 (13.6%)                | 31 (14.7%)       |
| <b>HIV status<sup>1,7</sup></b>                  | HIV-negative                                          | 37 (26.6%)           | 38 (27.1%)            | 38 (23.5%)                | 46 (21.8%)       |
|                                                  | Non-stratified                                        | 103 (74.1%)          | 103 (73.6%)           | 125 (77.2%)               | 166 (78.7%)      |

445 N: number of studies, ANC: antenatal care, FP: family planning, GYN: gynaecology clinic, PHC/OPD: Primary  
446 healthcare or outpatient department.

447 <sup>1</sup>The same study is included in more than one subcategory if it reports across different variable levels or when multiple  
448 levels are relevant. <sup>2</sup> Western and Central Africa combined for analysis. <sup>3</sup>Study without country- or region-specific  
449 reporting was allocated to Eastern Africa for analysis, according to where most participants were recruited. <sup>4</sup>Midpoint  
450 year between start and end of data collection period. <sup>5</sup>Community members recruited through non-clinical venues,  
451 such as social spaces or places of worship. <sup>6</sup>Studies reporting baseline data among trial participants. <sup>7</sup>Studies  
452 exclusively among populations living with HIV were excluded. Data were preferentially extracted and analysed without  
453 stratifying by HIV status if both were reported.  
454

455 **Table 2: Adjusted prevalence ratios for chlamydia, gonorrhoea, and trichomoniasis in sub-Saharan Africa,**  
 456 **estimated via log-binomial generalised linear mixed-effects models**

| Variable                                      | Chlamydia<br>aPR (95% CI) | Gonorrhoea<br>aPR (95% CI) | Trichomoniasis<br>aPR (95% CI) |
|-----------------------------------------------|---------------------------|----------------------------|--------------------------------|
| <b>Intercept</b>                              | 0.14 (0.11-0.18)          | 0.03 (0.02-0.05)           | 0.09 (0.07-0.12)               |
| <b>Sub-region</b>                             |                           |                            |                                |
| Western and Central                           | 0.31 (0.22-0.43)          | 0.36 (0.23-0.57)           | 0.94 (0.68-1.31)               |
| Eastern                                       | 0.38 (0.35-0.41)          | 0.64 (0.56-0.74)           | 1.01 (0.85-1.21)               |
| Southern                                      | Ref                       | Ref                        | Ref                            |
| <b>Sub-region:Sex<sup>1</sup></b>             |                           |                            |                                |
| Western and Central:Male                      | 0.63 (0.43-0.93)          | 1.05 (0.54-2.04)           | 0.14 (0.09-0.20)               |
| Eastern:Male                                  | 0.61 (0.53-0.70)          | 0.69 (0.56-0.85)           | 0.36 (0.30-0.44)               |
| Southern:Male                                 | 0.61 (0.55-0.66)          | 0.76 (0.65-0.90)           | 0.15 (0.11-0.20)               |
| <b>Sub-region:Year<sup>2</sup></b>            |                           |                            |                                |
| Western and Central:Year                      | 0.99 (0.95-1.03)          | 0.99 (0.94-1.04)           | 0.99 (0.96-1.02)               |
| Eastern:Year                                  | 1.07 (1.05-1.09)          | 1.01 (0.99-1.04)           | 0.97 (0.94-1.01)               |
| Southern:Year                                 | 1.02 (1.00-1.04)          | 1.02 (0.99-1.05)           | 0.96 (0.92-0.99)               |
| <b>Population</b>                             |                           |                            |                                |
| ANC attendees                                 | Ref                       | Ref                        | Ref                            |
| FP attendees                                  | 0.95 (0.63-1.45)          | 0.90 (0.50-1.64)           | 0.54 (0.32-0.90)               |
| GYN attendees                                 | 1.03 (0.57-1.88)          | 0.87 (0.42-1.82)           | 1.34 (0.80-2.25)               |
| PHC/OPD attendees                             | 0.81 (0.57-1.14)          | 1.49 (0.92-2.39)           | 0.94 (0.61-1.43)               |
| Students                                      | 1.06 (0.69-1.63)          | 1.14 (0.56-2.31)           | 1.23 (0.76-1.99)               |
| Community members                             | 0.97 (0.66-1.44)          | 1.10 (0.65-1.87)           | 0.96 (0.50-1.86)               |
| HIV/STI prevention trial participants         | 0.89 (0.61-1.28)          | 1.20 (0.72-1.99)           | 1.00 (0.62-1.63)               |
| Population-representative survey participants | 0.90 (0.58-1.42)          | 1.19 (0.64-2.20)           | 1.32 (0.71-2.44)               |
| <b>Age group</b>                              |                           |                            |                                |
| All adults (12+ years)                        | Ref                       | Ref                        | Ref                            |
| Younger adults (12 - 25 years)                | 1.14 (0.85-1.52)          | 1.12 (0.75-1.68)           | 0.55 (0.35-0.88)               |
| <b>HIV status</b>                             |                           |                            |                                |
| Non-stratified                                | Ref                       | Ref                        | Ref                            |
| HIV negative                                  | 1.42 (1.06-1.90)          | 1.06 (0.71-1.59)           | 0.79 (0.56-1.14)               |
| <b>Diagnostic test</b>                        |                           |                            |                                |
| NAAT                                          | Ref                       | Ref                        | Ref                            |
| Culture                                       | -                         | 1.60 (1.00-2.54)           | 1.36 (0.89-2.09)               |
| DFA                                           | 0.70 (0.32-1.51)          | -                          | -                              |
| ELISA                                         | 2.26 (0.86-5.98)          | -                          | -                              |
| Rapid antigen test                            | 2.94 (1.76-4.92)          | 0.52 (0.06-4.61)           | 1.03 (0.56-1.90)               |
| Wet mount                                     | -                         | -                          | 1.61 (1.14-2.29)               |
| <b>Model variance</b>                         |                           |                            |                                |
| $\tau^2$ fixed                                | 0.51                      | 0.16                       | 0.45                           |
| $\tau^2$ random                               | 0.34                      | 0.60                       | 0.60                           |
| <b>Number groups</b>                          |                           |                            |                                |
| Number studies                                | 139                       | 140                        | 162                            |
| Number observations                           | 202                       | 202                        | 207                            |

457 Generalised linear mixed-effects models on the risk of chlamydia, gonorrhoea, and trichomoniasis in sub-Saharan  
 458 Africa, using all study observations adjusted for diagnostic test performance.

459 <sup>1</sup>Reference sex is female. <sup>2</sup>Midpoint year between start and end of data collection period; centred at 2012.

460 aPR: adjusted prevalence ratio, 95% CI: 95% confidence interval, ANC: antenatal care, DFA: direct fluorescent  
 461 antibody, FP: family planning clinic, GYN: gynaecology clinic, NAAT: nucleic acid amplification test, PHC/OPD: primary  
 462 health care or outpatient department, Ref: Reference group,  $\tau^2$ : variance.  
 463

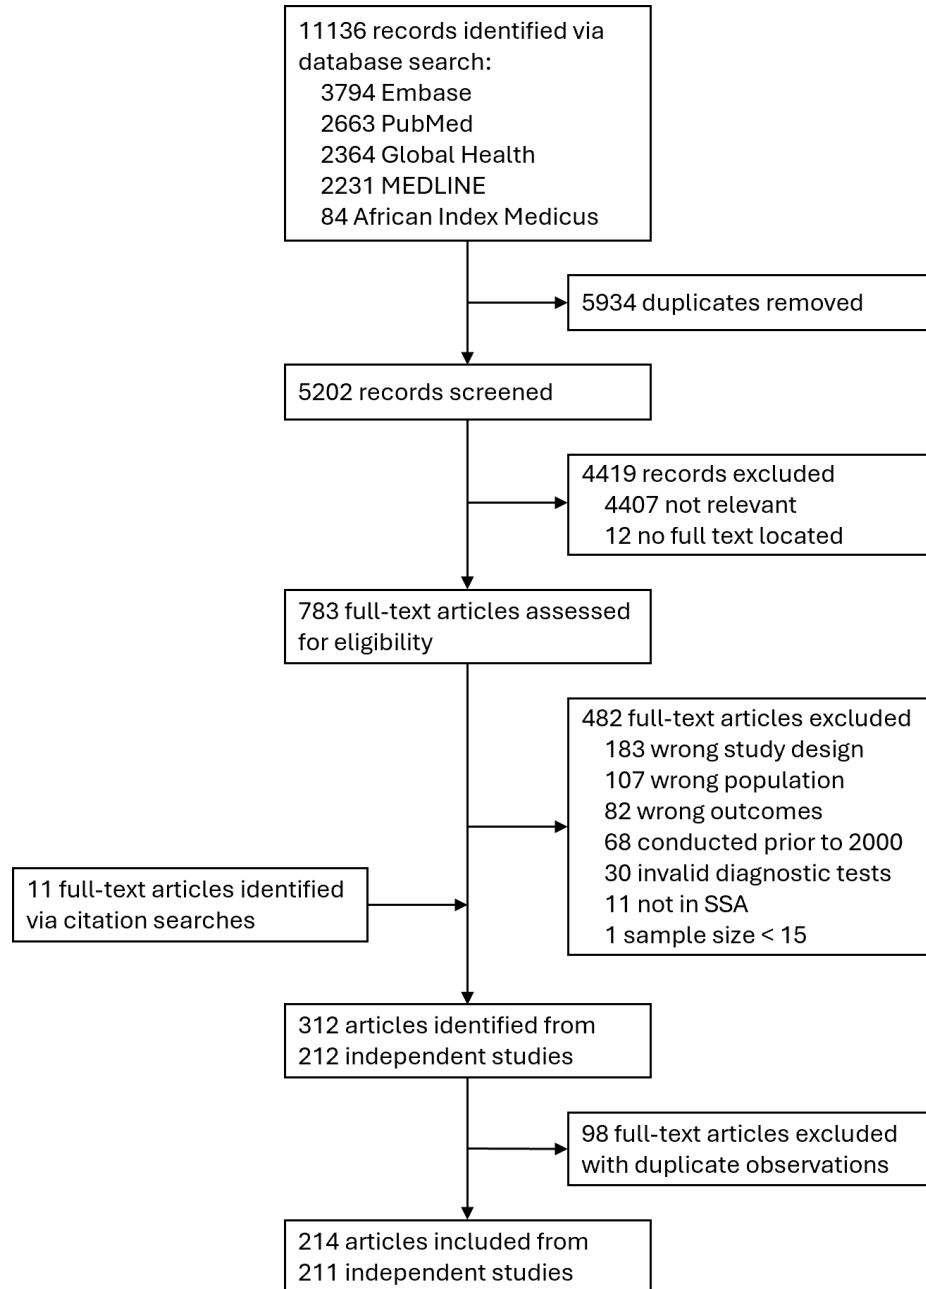

464

465 **Figure 1: Study selection flowchart.** Flowchart of study selection for systematic review.

466



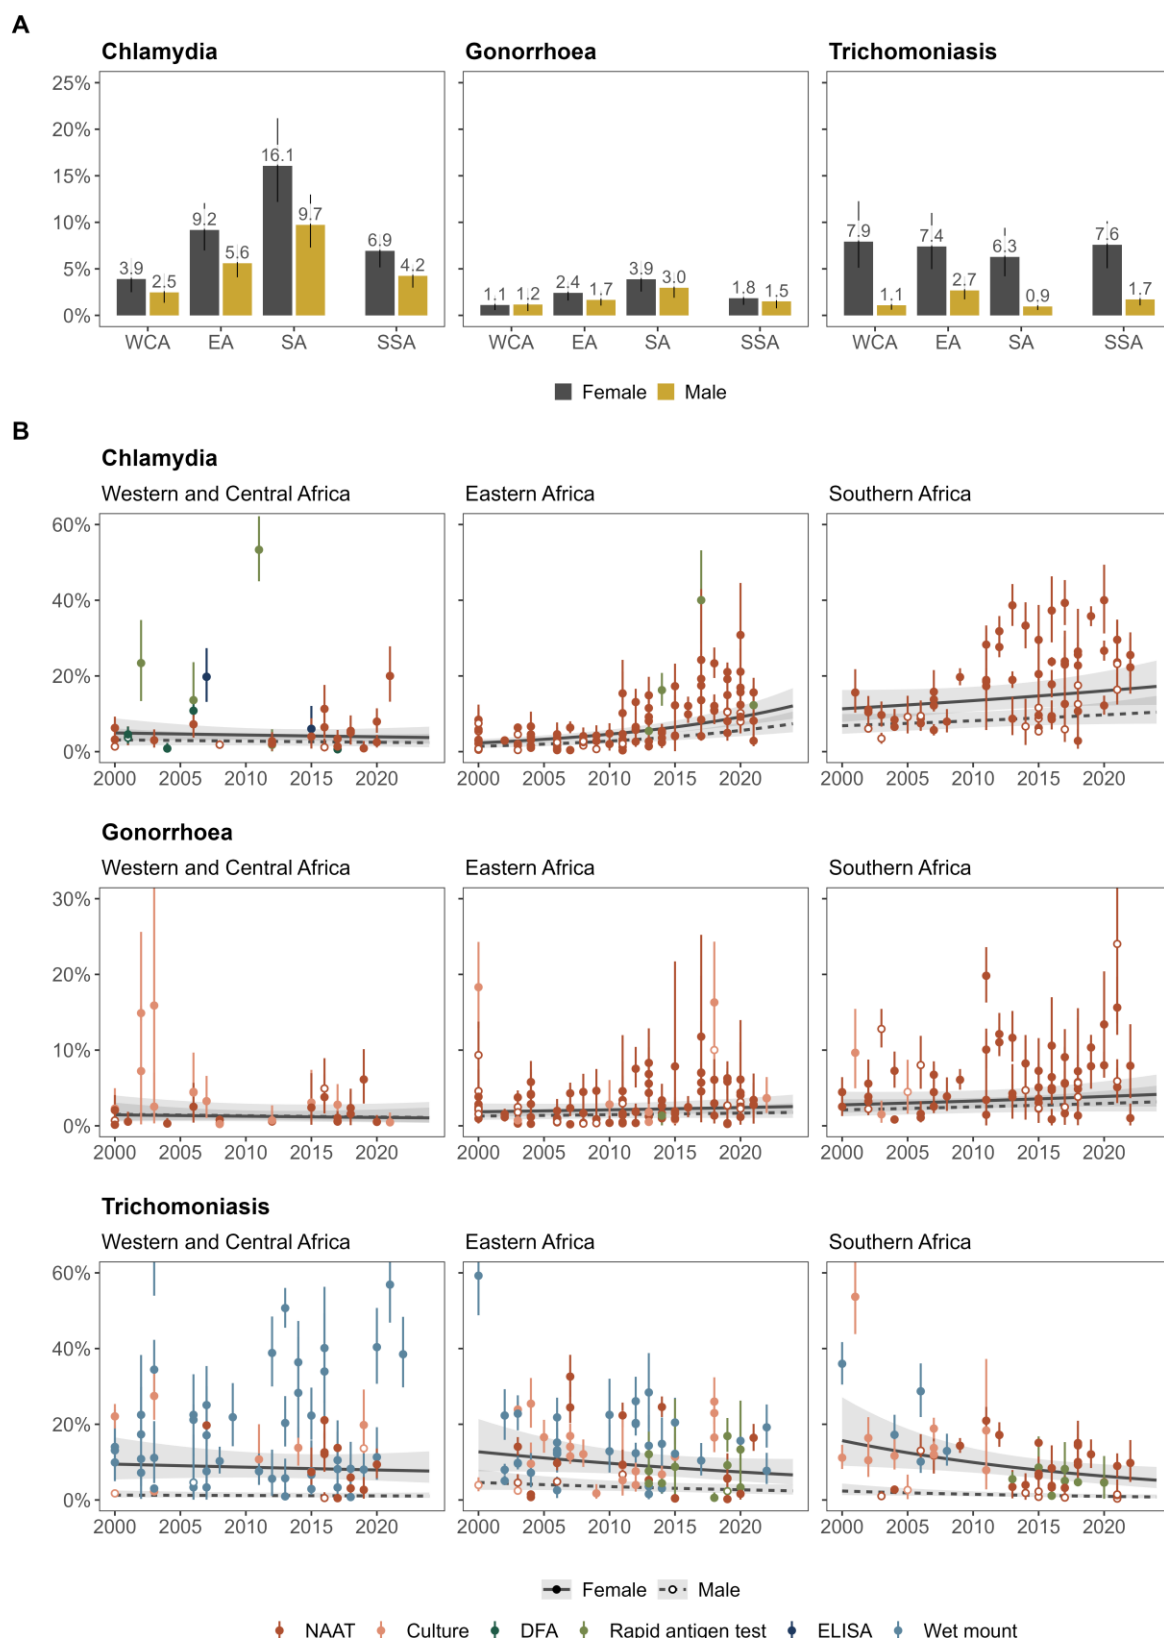

467  
 468 **Figure 2: Sexually transmitted infection prevalence per sub-region in sub-Saharan Africa.** Estimates of chlamydia,  
 469 gonorrhoea, and trichomoniasis prevalence by sex and sub-region. Sub-regional estimates generated using log-  
 470 binomial generalised linear mixed-effects models for each infection. Sub-Saharan African estimates represent sex-  
 471 matched population-weighted means. Panel A: Prevalence estimates in 2020. Bars and error lines depict mean  
 472 prevalence estimates with 95% confidence intervals. Panel B: Prevalence estimates between 2000 and 2024. Lines  
 473 and shaded areas depict mean prevalence estimates (solid line: females, dashed line: males) with 95% confidence

474 intervals. Points and error lines represent study prevalence observations (solid point: female, open point: male) with  
475 95% confidence intervals, colour coded according to diagnostic test category. Y-axes truncated. DFA: Direct  
476 fluorescent antibody, EA: Eastern Africa, NAAT: nucleic acid amplification test, SA: Southern Africa, SSA: Sub-Saharan  
477 Africa, WCA: Western and Central Africa.

### A Chlamydia

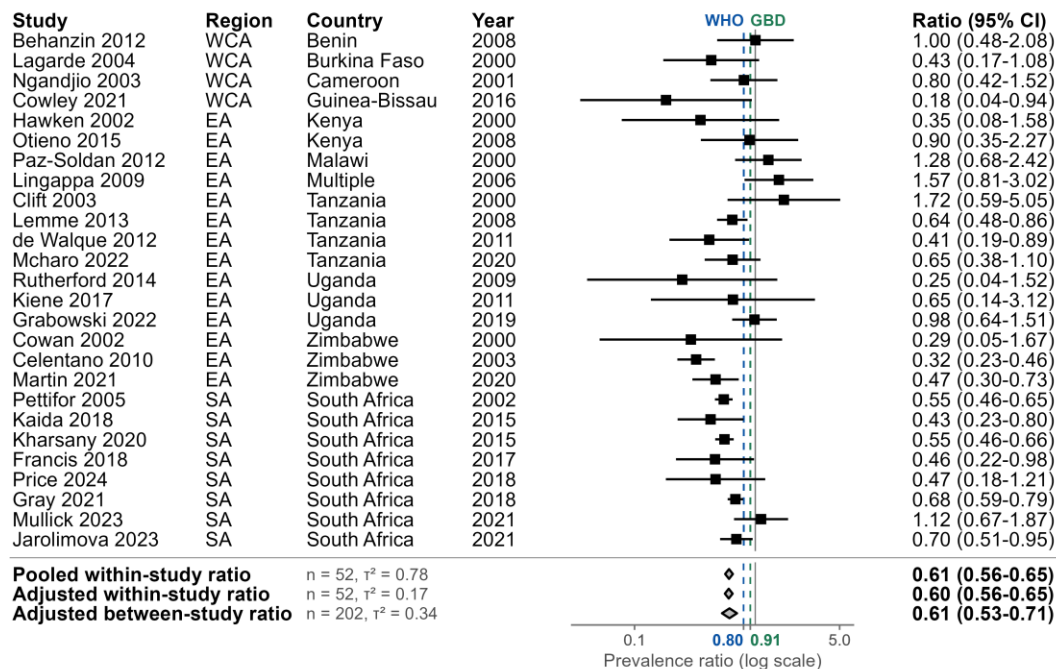

### B Gonorrhoea

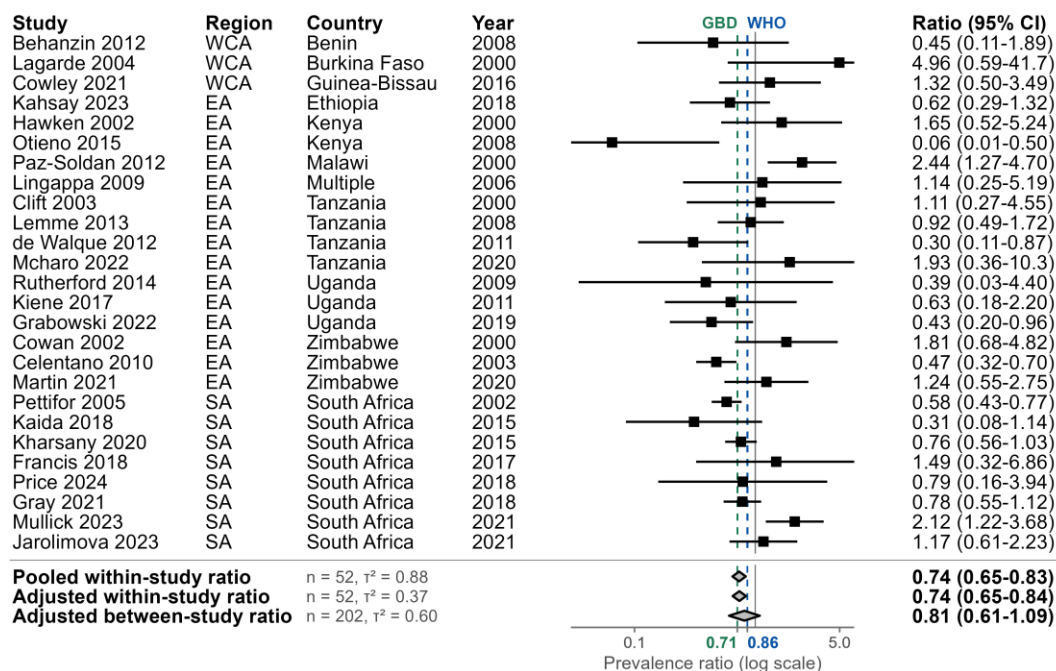

### C Trichomoniasis

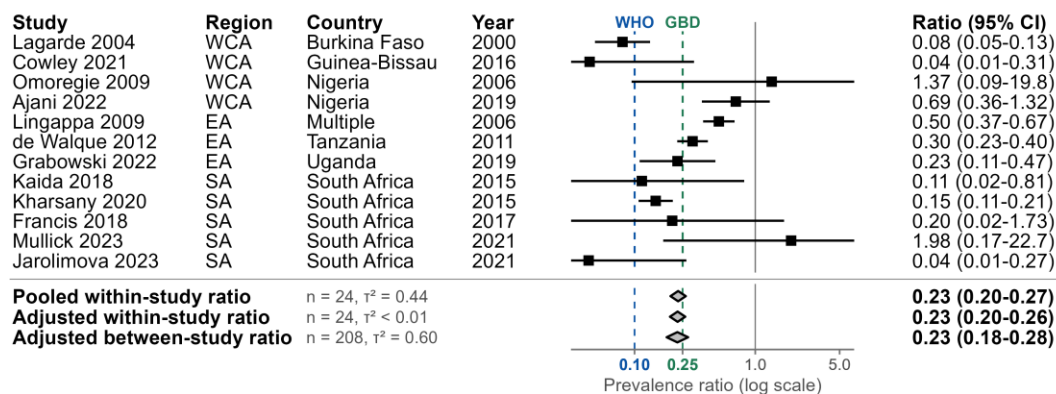

480 **Figure 3: Sexually transmitted infection male-to-female prevalence ratio estimates in sub-Saharan Africa.** Study  
481 observations and aggregate estimates of male-to-female prevalence ratios for (A) chlamydia, (B) gonorrhoea and (C)  
482 trichomoniasis. Ratios estimated using log-binomial generalised linear mixed-effects models per infection. Models for  
483 within-study ratios used study observations among both sexes and between-study ratios used all study observations.  
484 All models included sex as a fixed effect and study-level random intercepts. Pooled ratio models did not adjust for  
485 additional covariates. Adjusted ratio models included fixed effects for region, year, age-group, HIV-status, diagnostic  
486 test, and population group (between-study only). Points and error lines depict ratios and 95% confidence intervals for  
487 studies with observations among both sexes. Diamonds depict population-weighted mean ratios and 95% confidence  
488 intervals for sub-Saharan Africa, with adjusted ratios reported for 2020. Blue dotted lines and x-axis labels represent  
489 WHO global male-to-female prevalence ratios.<sup>5,8</sup> Green dotted lines and x-axis labels represent the Global Burden of  
490 Disease study male-to-female prevalence ratios.<sup>10</sup> X-axes are truncated. EA: Eastern Africa, SA: Southern Africa, WCA:  
491 Western and Central Africa, n: number of observations,  $\tau^2$ : variance for study random intercept.

492
